# Supplementary material for: CCDC102B confers risk of low vision and blindness in high myopia
Source: PubMed Central journal article supplement (PMC5934384; doi:10.1038/s41467-018-03649-3), 2018-05-03

***CCDC102B* confers risk of low vision and blindness in high myopia**

Hosoda et al.

**Supplementary Table 1. Description of the Nagahama cohort for our two-stage genome-wide association study on myopic maculopathy.**

| Stage       | N    | Female (%)   | Age (years) | Myopic maculopathy grade |     |     |    |   | AL (mm)      |
|-------------|------|--------------|-------------|--------------------------|-----|-----|----|---|--------------|
|             |      |              |             | 0                        | 1   | 2   | 3  | 4 |              |
| Discovery   | 4462 | 3014 (67.5%) | 52.0 ± 13.5 | 3640                     | 371 | 427 | 20 | 4 | 24.19 ± 1.43 |
| Replication | 3277 | 2231 (68.1%) | 54.4 ± 12.4 | 2563                     | 300 | 393 | 17 | 4 | 24.11 ± 1.44 |

AL, axial length

**Supplementary Table 2: Characteristics of participants in the high myopia study.**

|                                                             | <b>Nagahama</b> | <b>Kyoto</b> | <b>Tokyo</b> | <b>SCES</b>  | <b>SIMES</b> | <b>SINDI</b> |
|-------------------------------------------------------------|-----------------|--------------|--------------|--------------|--------------|--------------|
| N                                                           | 828             | 818          | 340          | 175          | 71           | 85           |
| Female (%)                                                  | 506 (61.1%)     | 492 (60.1%)  | 224 (65.9%)  | 91 (52.0%)   | 36 (50.7%)   | 23 (27.1%)   |
| Age (years)                                                 | 47.6 ± 12.7     | 61.4 ± 13.6  | 55.2 ± 13.3  | 53.4 ± 7.1   | 54.7 ± 11.1  | 45.9 ± 11.3  |
| Myopic maculopathy grade                                    |                 |              |              |              |              |              |
| 0                                                           | 371             | 16           | 3            | 83           | 10           | 19           |
| 1                                                           | 144             | 154          | 22           | 51           | 25           | 43           |
| 2                                                           | 275             | 318          | 91           | 30           | 32           | 23           |
| 3                                                           | 31              | 144          | 92           | 11           | 4            | 0            |
| 4                                                           | 7               | 186          | 132          | 0            | 0            | 0            |
| mCNV (+)                                                    | 0               | 225          | 150          | 0            | 0            | 0            |
| AL (mm)                                                     | 27.05 ± 1.06    | 28.75 ± 2.00 | 30.38 ± 1.53 | 26.60 ± 1.40 | 26.65 ± 1.60 | 26.03 ± 1.57 |
| mCNV, myopic choroidal neovascularization; AL, axial length |                 |              |              |              |              |              |

**Supplementary Table 3: *CCDC102B* rs11873439 effect allele frequency in Japanese population with high myopia.**

| Myopic maculopathy grade      | Effect allele | 0   |       | 1   |       | 2   |       | 3   |       | 4   |       | Total |       |
|-------------------------------|---------------|-----|-------|-----|-------|-----|-------|-----|-------|-----|-------|-------|-------|
|                               |               | N   | EAFF  | N   | EAFF  | N   | EAFF  | N   | EAFF  | N   | EAFF  | N     | EAFF  |
| Nagahama                      | C             | 371 | 0.427 | 144 | 0.413 | 275 | 0.522 | 31  | 0.516 | 7   | 0.286 | 828   | 0.458 |
| Kyoto, Tokyo                  | C             | 18  | 0.417 | 172 | 0.395 | 335 | 0.452 | 151 | 0.447 | 482 | 0.472 | 1158  | 0.451 |
| Total                         | C             | 389 | 0.427 | 316 | 0.403 | 610 | 0.484 | 182 | 0.459 | 489 | 0.469 | 1986  | 0.454 |
| EAF, effect allele frequency. |               |     |       |     |       |     |       |     |       |     |       |       |       |

**Supplementary Table 4: Association of rs11873439 with myopic maculopathy in the subgroups categorized with axial length using Nagahama cohort samples.**

| Axial length (mm) | Effect allele | Myopic maculopathy (-) |       | Myopic maculopathy (+) |       | P                     | OR (95% CI)           | P*                    | OR (95% CI)*          |
|-------------------|---------------|------------------------|-------|------------------------|-------|-----------------------|-----------------------|-----------------------|-----------------------|
|                   |               | N                      | EAF   | N                      | EAF   |                       |                       |                       |                       |
| < 22              | C             | 211                    | 0.455 | 4                      | 0.625 | 0.339                 | 2.00<br>(0.47 – 8.46) | 0.313                 | 2.12<br>(0.49 – 9.05) |
| 22-24             | C             | 3643                   | 0.425 | 223                    | 0.514 | $2.52 \times 10^{-4}$ | 1.43<br>(1.18 – 1.73) | $4.67 \times 10^{-5}$ | 1.51<br>(1.24 – 4.07) |
| 24-26             | C             | 2505                   | 0.427 | 325                    | 0.520 | $7.14 \times 10^{-6}$ | 1.45<br>(1.23 – 1.71) | $4.37 \times 10^{-5}$ | 1.44<br>(1.21 – 1.72) |
| 26-28             | C             | 491                    | 0.422 | 222                    | 0.523 | $3.92 \times 10^{-4}$ | 1.50<br>(1.20 – 1.88) | 0.00479               | 1.45<br>(1.12 – 1.87) |
| 28 <              | C             | 24                     | 0.458 | 91                     | 0.500 | 0.608                 | 1.18<br>(0.62 – 2.24) | 0.490                 | 1.29<br>(0.63 – 2.64) |

EAF, effect allele frequency; OR, odds ratio, CI, confidence interval.  
\*adjusted for age, sex, and axial length

**Supplementary Figure 1: Quantile-quantile (QQ) plots from the discovery stage.**

The QQ plot for associations between all analyzed single nucleotide polymorphisms (SNPs) and myopic maculopathy in the discovery stage. Each blue dot represents an observed statistic (defined as  $-\log_{10} P$ ) versus the corresponding expected statistic before genomic control, while each red dot represents the observed statistic versus the corresponding expected statistic after genomic control. The black line corresponds to the null distribution.

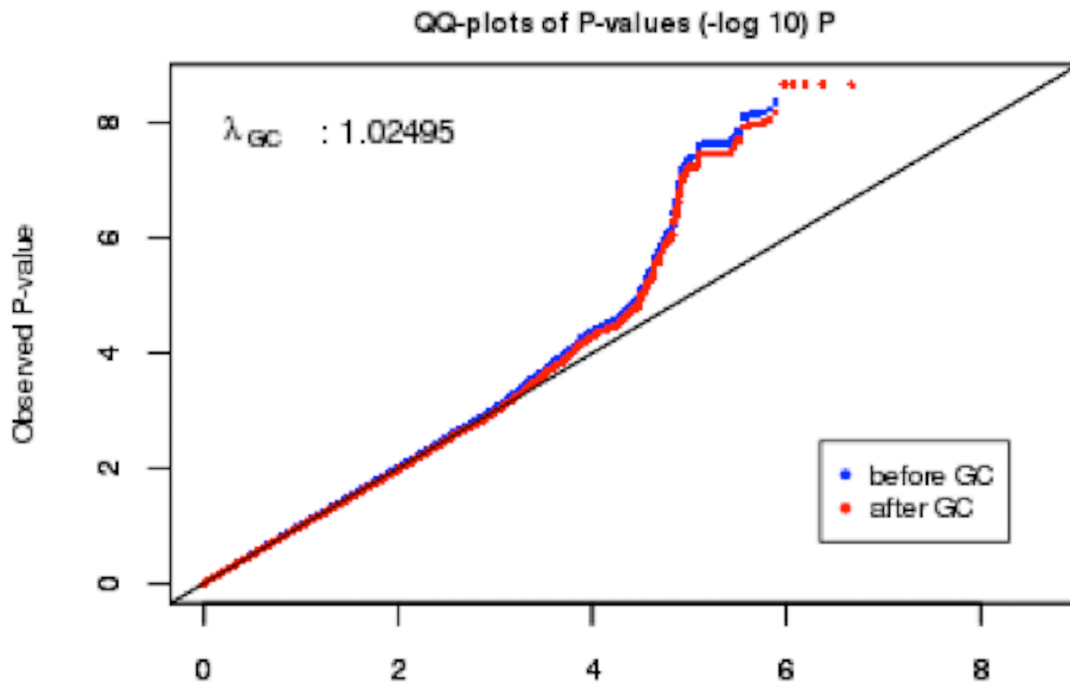

Supplement: 41467_2018_3649_MOESM1_ESM.pdf [file 41467_2018_3649_MOESM1_ESM.pdf]
